# Supplementary material for: SspH, a Novel HATPase Family Regulator, Controls Antibiotic Biosynthesis in Streptomyces
Source: MDPI journal article supplement (doi:10.3390/antibiotics11050538), 2022-04-19
Supplement: s1 [file s1]

# SspH, a novel HATPase family regulator, controls antibiotic biosynthesis in *Streptomyces*

Xue Yang <sup>1,†</sup>, Yanyan Zhang <sup>1,†,\*</sup>, Shanshan Li <sup>1</sup>, Lan Ye <sup>1,2</sup>, Xiangjing Wang <sup>2</sup>, Wensheng Xiang <sup>1,2,\*</sup>

<sup>1</sup> State Key Laboratory for Biology of Plant Diseases and Insect Pests, Institute of Plant Protection, Chinese Academy of Agricultural Sciences, No. 2 Yuanmingyuan West Road, Haidian District, Beijing, 100193, China; yangxue504499816@163.com (X.Y.); ssl@ippcaas.cn (S.L.); yelan\_617@163.com (L.Y.)

<sup>2</sup> School of Life Science, Northeast Agricultural University, No. 59 Mucai Street, Xiangfang District, Harbin 150030, China; wangneau2013@163.com (X.W.)

\* Correspondence: yyzhang@ippcaas.cn (Y.Z.), xiangwensheng@neau.edu.cn (W.X.)

† These authors contributed equally to this work.

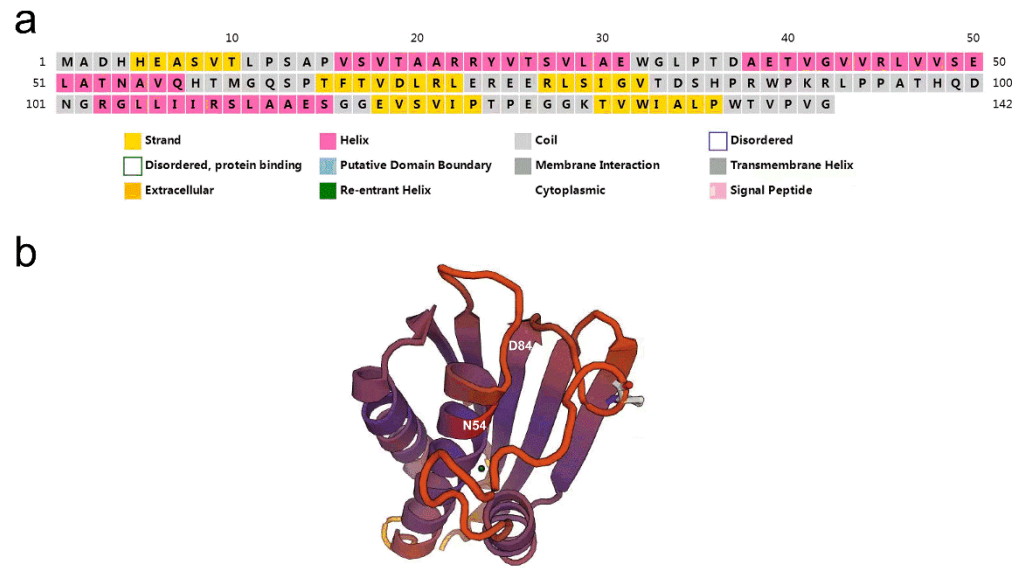

Figure S1. Secondary and three-dimensional (3D) structure of SspH. **(a)** Secondary structure of SspH. **(b)** Putative 3D structure. The homologous three - dimensional (3D) structure model for SspH was constructed based on the *Bacillus* anti - sigma factor SpoIIAB.

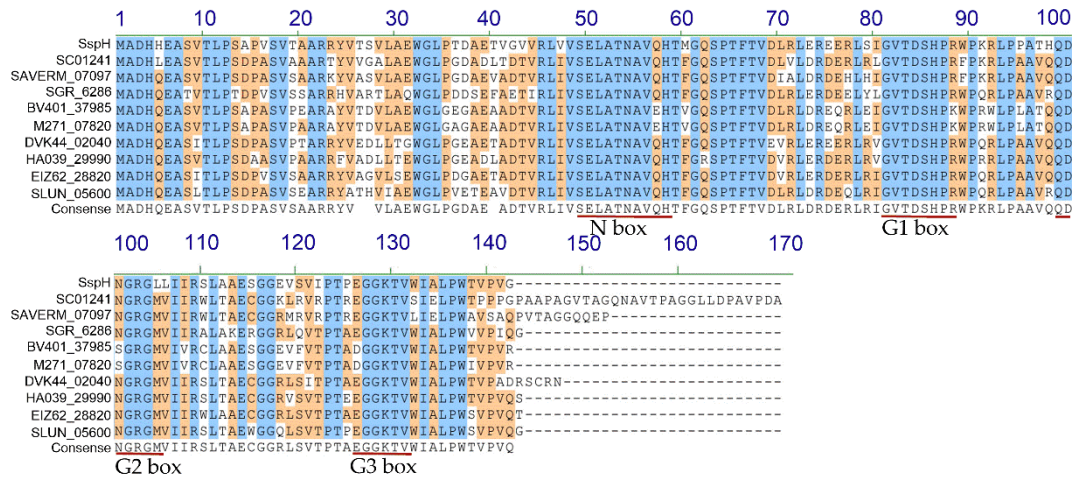

Figure S2. Amino acid sequence alignment of SspH and its orthologs. Identical or similar residues in all sequences are highlighted in blue and orange, respectively. The corresponding assumed conserved motifs are marked in red line. SCO1241, SspH ortholog from *S. coelicolor*; SAVERM\_07097, SspH ortholog from *S. avermitilis*; SGR\_6286, SspH ortholog from *S. griseus*, BV401\_37985, SspH ortholog from *S. autolyticus*; M271\_07820, SspH ortholog from *S. rapamycinicus*; DKV44\_02040, SspH ortholog from *S. paludis*, HA039\_29990, SspH ortholog from *S. liangshanensis*; EIZ62\_28820, SspH ortholog from *S. ficellus*; SLUN\_05600, SspH ortholog from *S. lunaelactis*.

Table S1. Genes whose products contain only the HATPase domain in several *Streptomyces* species

| Strain                    | Gene ID                                                                                                                                                                                                                                                                                                                       |
|---------------------------|-------------------------------------------------------------------------------------------------------------------------------------------------------------------------------------------------------------------------------------------------------------------------------------------------------------------------------|
| <i>S. coelicolor</i>      | <i>sco0673, sco0702, sco0868, sco1241, sco2864, sco3066, sco3423, sco3724, sco3930, sco4412, sco4677, sco4941, sco5103, sco5460, sco5915, sco5978, sco6130, sco6156, sco6237, sco6749, sco6949, sco7313, sco7328, sco7446, sco7328, sco7614</i>                                                                               |
| <i>S. avermitilis</i>     | <i>saverm_0234, saverm_1437, saverm_1664, saverm_2076, saverm_2174, saverm_2785, saverm_2797, saverm_3186, saverm_3424, saverm_3488, saverm_3738, saverm_3761, saverm_3991, saverm_4086, saverm_4225, saverm_4398, saverm_4615, saverm_4783, saverm_5014, saverm_5201, saverm_5409, saverm_5755, saverm_6252, saverm_7097</i> |
| <i>S. bingchenggensis</i> | <i>sbi_02080, sbi_02469, sbi_02795, sbi_03226, sbi_03585, sbi_03656, sbi_03703, sbi_03978, sbi_04142, sbi_04846, sbi_05023, sbi_05275, sbi_05655, sbi_05899, sbi_06283, sbi_06400, sbi_06722, sbi_07227, sbi_08076, sbi_08867, sbi_09291</i>                                                                                  |

Table S2. Amino acid sequences alignment of homologous proteins from *S. bingchenggensis* and other *Streptomyces* species

| Proteins  | Coverage/identity(%) to genes of                   |
|-----------|----------------------------------------------------|
| SBI_05734 | <i>S. coelicolor</i> ; BldC (SCO4091): 100/100     |
| SBI_03959 | <i>S. avermitilis</i> ; WblE (SAVERM_3016): 78/100 |
| SBI_05953 | <i>S. venezuelae</i> ; Lsr2 (SVEN_3225): 99/66     |
| SBI_03799 | <i>S. coelicolor</i> ; SCO5351: 84/81              |
| SBI_06268 | <i>S. coelicolor</i> ; BldM (SCO4768): 100/100     |
| SBI_05811 | <i>S. coelicolor</i> ; WblA (SCO3579): 100/89      |
| SBI_04164 | <i>S. coelicolor</i> ; WblI (SCO5046): 76/86       |

Table S3. Number of hits of SspH homologous sequence in different bacteria after PSI-BLAST search

| Organism                                               | Number of hits |
|--------------------------------------------------------|----------------|
| <i>Streptomyces</i>                                    | 1379           |
| <i>Kitasatospora</i>                                   | 3              |
| <i>Streptosporangium nondiastaticum</i>                | 2              |
| <i>Actinospica acidiphila</i>                          | 6              |
| <i>unclassified Actinomycetia</i>                      | 4              |
| <i>Mesorhizobium</i> sp. B2-3-3<br>(non-Actinomycetia) | 1              |

Table S4. Three milbemycin biosynthetic genes (*milR*, *milF* and *milA1*) and their functions

| Gene ID                              | Type of product | Function                                                                                                                                                                                                                                                                 | Reference |
|--------------------------------------|-----------------|--------------------------------------------------------------------------------------------------------------------------------------------------------------------------------------------------------------------------------------------------------------------------|-----------|
| <i>sbi_00734</i><br>( <i>milR</i> )  | MilR            | LAL family regulator; a cluster-situated key activator of milbemycin biosynthesis; activating the transcription of the <i>milA4-E</i> operon and <i>milF</i> directly and activating the transcription of the other milbemycin biosynthetic structural genes indirectly. | [1]       |
| <i>sbi_00731</i><br>( <i>milF</i> )  | MilF            | The tailoring enzyme gene encoding C5-ketoreductase responsible for the ketonization of milbemycins.                                                                                                                                                                     | [2]       |
| <i>sbi_00789</i><br>( <i>milA1</i> ) | MilA1           | The milbemycin polyketide synthase (PKS) gene; containing the loading module and two extension modules responsible for polyketide chain extension.                                                                                                                       | [3]       |

Table S5. 31 antibiotic biosynthetic core genes and their putative functions

| Biosynthetic core gene | Putative function                                                   | Predicted product type              |
|------------------------|---------------------------------------------------------------------|-------------------------------------|
| <i>sbi_00140</i>       | amino acid adenylation domain-containing protein                    | PKS-NRPS hybrid for moenomycin      |
| <i>sbi_00220</i>       | putative squalene-hopene cyclase                                    | Terpene                             |
| <i>sbi_00319</i>       | modular polyketide synthase                                         | PKS-NRPS hybrid for leinamycin      |
| <i>sbi_00522</i>       | modular polyketide synthase                                         | PKS-NRPS hybrid for BE-14106        |
| <i>sbi_00625</i>       | amino acid adenylation domain-containing protein                    | NRPS                                |
| <i>sbi_00655</i>       | modular polyketide synthase                                         | Type I PKS for pimaricin            |
| <i>sbi_00671</i>       | putative mixed polyketide synthase/non-ribosomal peptide synthetase | Type I PKS for meridamycin          |
| <i>sbi_00822</i>       | non-ribosomal peptide synthetase                                    | NRPS                                |
| <i>sbi_00956</i>       | non-ribosomal peptide synthetase                                    | PKS-NRPS hybrid                     |
| <i>sbi_01029</i>       | putative polyketide synthase                                        | Type I PKS                          |
| <i>sbi_01080</i>       | pentalenene synthase                                                | Terpene                             |
| <i>sbi_01365</i>       | amino acid adenylation domain-containing protein                    | PKS-NRPS hybrid for lasalocid       |
| <i>sbi_01540</i>       | putative polyketide synthase                                        | Type I PKS for borrelidin           |
| <i>sbi_01983</i>       | modular polyketide synthase                                         | Type I PKS for mycinamicin          |
| <i>sbi_02068</i>       | putative germacradienol synthase                                    | Terpene                             |
| <i>sbi_02232</i>       | group-specific protein                                              | Cyclothiazomycin                    |
| <i>sbi_02590</i>       | squalene/phytoene synthase                                          | Terpene for hopanoid                |
| <i>sbi_02764</i>       | 3-oxoacyl-ACP synthase I                                            | Type II PKS for grey spore pigment  |
| <i>sbi_02988</i>       | amino acid adenylation domain protein                               | PKS-NRPS for calcium-dep antibiotic |



| Biosynthetic core gene | Putative functions                               | Predicted product type            |
|------------------------|--------------------------------------------------|-----------------------------------|
| <i>sbi_03179</i>       | type I modular polyketide synthase               | PKS-NRPS hybrid for borrelidin    |
| <i>sbi_06052</i>       | amino acid adenylation domain-containing protein | PKS-NRPS hybrid                   |
| <i>sbi_06449</i>       | non-ribosomal peptide synthetase                 | Desferrioxamin                    |
| <i>sbi_06799</i>       | non-ribosomal peptide synthetase                 | NRPS for melanin                  |
| <i>sbi_06873</i>       | glycosyl transferase                             | Type II PKS for Polyketomycin     |
| <i>sbi_08414</i>       | modular polyketide synthase                      | Nanchangmycin (by type I PKS)     |
| <i>sbi_08957</i>       | 2-methylisoborneol synthase                      | Terpene                           |
| <i>sbi_09057</i>       | putative non-ribosomal peptide synthase          | Melanin                           |
| <i>sbi_09195</i>       | modular polyketide synthase                      | PKS-NRPS hybrid for lymphostin    |
| <i>sbi_09249</i>       | non-ribosomal peptide synthetase                 | NRPS for moenomycin               |
| <i>sbi_09652</i>       | non-ribosomal peptide synthetase                 | Oxazolomycin (by PKS-NRPS hybrid) |
| <i>sbi_10015</i>       | putative type I polyketide synthase WcbR         | Type I PKS                        |

Table S6. Strains used in this work

| Strain                              | Characteristics                                                             | Source             |
|-------------------------------------|-----------------------------------------------------------------------------|--------------------|
| <i>Escherichia coli</i>             |                                                                             |                    |
| <i>E. coli</i> JM109                | Host for all plasmids cloning procedures                                    | Novagen            |
| ET12567 (pUZ8002)                   | Donor strain for conjugation between <i>E. coli</i> and <i>Streptomyces</i> | [1]                |
| <i>Streptomyces bingchenggensis</i> |                                                                             |                    |
| BC04                                | Milbemycin high-yield strain obtained by random mutagenesis                 | [4]                |
| BC04-C1                             | BC04 carrying pSET152                                                       | This work          |
| BC04-C2                             | BC04 carrying pSETddCpf1                                                    | This work          |
| BC04/OsspH                          | BC04 carrying pSET152::P <sub>hrdB</sub> ::sspH                             | This work          |
| BC04/RsspH                          | BC04 carrying pSETddCpf1::sspH                                              | This work          |
| BC04/O1241                          | BC04 carrying pSET152::P <sub>hrdB</sub> ::1241                             | This work          |
| BC04/O7097                          | BC04 carrying pSET152::P <sub>hrdB</sub> ::7097                             | This work          |
| <i>Streptomyces coelicolor</i>      |                                                                             |                    |
| M145                                | Actinorhodin producer                                                       | [1]                |
| M145/OsspH                          | M145 carrying pSET152::P <sub>hrdB</sub> ::sspH                             | This work          |
| M145/O1241                          | M145 carrying pSET152::P <sub>hrdB</sub> ::1241                             | This work          |
| M145/O7097                          | M145 carrying pSET152::P <sub>hrdB</sub> ::7097                             | This work          |
| <i>Streptomyces avermitilis</i>     |                                                                             |                    |
| NEAU12                              | Avermectin high-yield producer                                              | Laboratory storage |
| NEAU12/OsspH                        | NEAU12 carrying pSET152::P <sub>hrdB</sub> ::sspH                           | This work          |
| NEAU12/O1241                        | NEAU12 carrying pSET152::P <sub>hrdB</sub> ::1241                           | This work          |
| NEAU12/O7097                        | NEAU12 carrying pSET152::P <sub>hrdB</sub> ::7097                           | This work          |

Table S7. Plasmids used in this work

| Names                                         | Characteristics                                                                                                           | Source     |
|-----------------------------------------------|---------------------------------------------------------------------------------------------------------------------------|------------|
| pSET152                                       | Apr <sup>R</sup> , integrative <i>E. coli-Streptomyces</i> shuttle vector                                                 | [1]        |
| pSET152::P <sub>hrdB</sub>                    | pSET152 containing P <sub>hrdB</sub>                                                                                      | This work  |
| pSET152::P <sub>hrdB</sub> ::sspH             | pSET152::P <sub>hrdB</sub> containing <i>sspH</i>                                                                         | This work  |
| pSET152::P <sub>hrdB</sub> ::1241             | pSET152::P <sub>hrdB</sub> containing <i>sco1241</i>                                                                      | This work  |
| pSET152::P <sub>hrdB</sub> ::7097             | pSET152::P <sub>hrdB</sub> containing <i>saverm_7097</i>                                                                  | This work  |
| pSETddCpf1                                    | pSET152 with the scocpf1 (E1006A) gene under the control of the <i>ermE*</i> <i>p</i> promoter                            | [5]        |
| pSETddCpf1::sspH                              | pSETddCpf1 containing the crRNA transcription cassette for editing <i>sspH</i>                                            | This work  |
| pBluescript II KS (+)                         | Amp <sup>R</sup> , <i>E. coli</i> cloning vector                                                                          | Stratagene |
| pBluescript II KS(+):P <sub>hrdB</sub> ::sspH | pBluescript II KS(+) containing <i>sspH</i> under the control of P <sub>hrdB</sub>                                        | This work  |
| pBluescript II KS(+):P <sub>hrdB</sub> ::N54A | pBluescript II KS(+) containing mutagenized <i>sspH</i> (mutation of Asn54 to Ala) under the control of P <sub>hrdB</sub> | This work  |
| pBluescript II KS(+):P <sub>hrdB</sub> ::D84A | pBluescript II KS(+) containing mutagenized <i>sspH</i> (mutation of Asp84 to Ala) under the control of P <sub>hrdB</sub> | This work  |
| pSET152::P <sub>hrdB</sub> ::N54A             | pSET152 containing mutagenized <i>sspH</i> (mutation of Asn54 to Ala) under the control of P <sub>hrdB</sub>              | This work  |
| pSET152::P <sub>hrdB</sub> ::D84A             | pSET152 containing mutagenized <i>sspH</i> (mutation of Asp84 to Ala) under the control of P <sub>hrdB</sub>              | This work  |

Table S8. Primers used in this work

| Name          | Sequence (5'-3')                                          | Usage                                             |
|---------------|-----------------------------------------------------------|---------------------------------------------------|
| sspH-F        | GCCGTTTTTCAACGTTCCGAGAGGTTGTTCATGGCTGACCACCACGAAGCA       | Construction of pSET152::P <sub>hrdB</sub> ::sspH |
| sspH-R        | T<br>CGACTCTAGAGGATCCGCGGCCGCGCGCATCACCACGGGGCACGTCAAG    |                                                   |
|               | C                                                         |                                                   |
| ddCpf1-sspH-F | GACTAGTCGTTCCAGCCGAGATCCACCGTATCTACAACAGTAGAAATTG         | Construction of pSETddCpf1::sspH                  |
| ddCpf1-R      | G                                                         |                                                   |
|               | GGAATTCCATATGTGGATCCTACCAACCGGCACGATT                     |                                                   |
| sco1241-F     | GCCGTTTTTCAACGTTCCGAGAGGTTGTTCATGGCAGACCATCTGGAAGCA       | Construction of pSET152::P <sub>hrdB</sub> ::1241 |
| sco1241-R     | TCC<br>CGACTCTAGAGGATCCGCGGCCGCGCGGATAAGGGCCGGATCTGGCAGC  |                                                   |
|               | C                                                         |                                                   |
| saverm_7097-F | GCCGTTTTTCAACGTTCCGAGAGGTTGTTCATGGCAGATCACCAGGAAGC        | Construction of pSET152::P <sub>hrdB</sub> ::7097 |
| saverm_7097-R | ATCCG<br>CGACTCTAGAGGATCCGCGGCCGCGCGGATTACCCGGACGGCCGAACA |                                                   |
|               | CC                                                        |                                                   |
| N54A-F        | GCCGCCGTCCAGCACACGATGGGCCAGTCGCC                          | Construction of pSET152::P <sub>hrdB</sub> ::D54A |
| N54A-R        | GGTGGCGAGTTCGAGACGACGAGCCGTACGA                           |                                                   |
| D84A-F        | GCCAGCCACCCCAGATGGCCCAAACGCCTGCC                          | Construction of pSET152::P <sub>hrdB</sub> ::D84A |
| D84A-R        | GGTGACGCCGATGCTCAGCCGCTCTTCGCGTT                          |                                                   |

| Name         | Sequence (5'-3')        | Usage                                |
|--------------|-------------------------|--------------------------------------|
| Q16S-F       | TGTCGTGAGATGTTGGGTTAAG  | qRT-PCR analysis of 16S rRNA         |
| Q16S-R       | TCATTGTACCGGCCATTGTAG   |                                      |
| QmilA1-F     | GCCGTATCGTCTTCGTCTTC    | qRT-PCR analysis of <i>milA1</i>     |
| QmilA1-R     | TGGAGGATGTCCGTGAGT      |                                      |
| QmilR-F      | GCAAGAGCGAATTCCTGAAG    | qRT-PCR analysis of <i>milR</i>      |
| QmilR-R      | CTGTGACGGAGCGAGTC       |                                      |
| QmilF-F      | AGGTCACTCAGGAGGAGTT     | qRT-PCR analysis of <i>milF</i>      |
| QmilF-R      | GAGGAGATGTTGACGATCCG    |                                      |
| QsspH-F      | GGCTGGAACGCGAAGAG       | qRT-PCR analysis of <i>sspH</i>      |
| QsspH-R      | CCGACCGTTGTCCTGATG      |                                      |
| Qsbi_00140-F | GGGAGCGTGTCGAAGAAG      | qRT-PCR analysis of <i>sbi_00140</i> |
| Qsbi_00140-R | GCACACCGAGTGATGTATGT    |                                      |
| Qsbi_00220-F | CTGTCCGTCTTCTGCTATGTC   | qRT-PCR analysis of <i>sbi_00220</i> |
| Qsbi_00220-R | CGAGCATGGTCGGATTGT      |                                      |
| Qsbi_00319-F | TGTACGTCAACACCACCAC     | qRT-PCR analysis of <i>sbi_00319</i> |
| Qsbi_00319-R | AGTACGGCGTGCACATT       |                                      |
| Qsbi_00522-F | AAAGGCACGATCCGTACAC     | qRT-PCR analysis of <i>sbi_00522</i> |
| Qsbi_00522-R | GGCCTCTTTCGGCGATATAC    |                                      |
| Qsbi_00625-F | CTTCGCCAACTACTTCCACTC   | qRT-PCR analysis of <i>sbi_00625</i> |
| Qsbi_00625-R | CCATGAACATGTCTGAAGGAGAA |                                      |

| Name         | Sequence (5'-3')       | Usage                                |
|--------------|------------------------|--------------------------------------|
| Qsbi_00655-F | AGCTACCAGGACTACACCA    | qRT-PCR analysis of <i>sbi_00655</i> |
| Qsbi_00655-R | CTCGAGCCCGAACACATAG    |                                      |
| Qsbi_00671-F | GGCGTGATGAGCAACGATTA   | qRT-PCR analysis of <i>sbi_00671</i> |
| Qsbi_00671-R | CCGGTGAAGTCGAAGAAGTG   |                                      |
| Qsbi_00822-F | CTGCCGCTGTTCCCTATATC   | qRT-PCR analysis of <i>sbi_00822</i> |
| Qsbi_00822-R | AATTCATCGGGCCGGTTC     |                                      |
| Qsbi_00956-F | CACCGTACGTAACGCGAAAT   | qRT-PCR analysis of <i>sbi_00956</i> |
| Qsbi_00956-R | CGTAGAGGTCTGTTGCGTATTC |                                      |
| Qsbi_01029-F | CACCTGGTGTACGTCGAAAT   | qRT-PCR analysis of <i>sbi_01029</i> |
| Qsbi_01029-R | AGGCCGTCCATGCTTTC      |                                      |
| Qsbi_01080-F | ACGGAGTATCTGCACTCCTA   | qRT-PCR analysis of <i>sbi_01080</i> |
| Qsbi_01080-R | CGAACCGCTCGTTGAGAT     |                                      |
| Qsbi_01365-F | GAGAGATCGAGGAGTGGGAA   | qRT-PCR analysis of <i>sbi_01365</i> |
| Qsbi_01365-R | GGTCGAAAGCGGTCTTGT     |                                      |
| Qsbi_01540-F | CTGTGGAGTTGCTGGATTCT   | qRT-PCR analysis of <i>sbi_01540</i> |
| Qsbi_01540-R | CGTCCTCCAACGACCAATC    |                                      |
| Qsbi_01983-F | GACTACTGGTACCGCAATCTG  | qRT-PCR analysis of <i>sbi_01983</i> |
| Qsbi_01983-R | CGAGCTGACCTCGATGAAC    |                                      |
| Qsbi_02068-F | TTCTTCTTCGACGACCACTTC  | qRT-PCR analysis of <i>sbi_02068</i> |
| Qsbi_02068-R | GGGAGCACCGGCATAAA      |                                      |

| Name         | Sequence (5'-3')        | Usage                                |
|--------------|-------------------------|--------------------------------------|
| Qsbi_02232-F | CCGCTTCGAGCGCTATC       | qRT-PCR analysis of <i>sbi_02232</i> |
| Qsbi_02232-R | GTGAGCACCTGTACCTGAC     |                                      |
| Qsbi_02590-F | CATGGCGATCTACGGCTAC     | qRT-PCR analysis of <i>sbi_02590</i> |
| Qsbi_02590-R | AGCATCATGAGCGGATCG      |                                      |
| Qsbi_02764-F | TGGAGCAGGACTACGTCAA     | qRT-PCR analysis of <i>sbi_02764</i> |
| Qsbi_02764-R | GAAGGCGTGGTGCAGATAC     |                                      |
| Qsbi_02988-F | CATGAGCTGCTGGCATATCT    | qRT-PCR analysis of <i>sbi_02988</i> |
| Qsbi_02988-R | ATGTACAGCGGCAGTGATG     |                                      |
| Qsbi_03179-F | CCATTTCGTCCTTCTGGGATATT | qRT-PCR analysis of <i>sbi_03179</i> |
| Qsbi_03179-R | GGACTTGGTGTTCGGTCTC     |                                      |
| Qsbi_06052-F | TCCGGCGTATCTCATCTACA    | qRT-PCR analysis of <i>sbi_06052</i> |
| Qsbi_06052-R | GTGACATCAGGAGGAAGGTC    |                                      |
| Qsbi_06449-F | GTCCTTTCGGGCGGATTT      | qRT-PCR analysis of <i>sbi_06449</i> |
| Qsbi_06449-R | GCTGAAGCGTCAGAGAGTAAG   |                                      |
| Qsbi_06799-F | TCCTGGTCTTCGAGAACTATCC  | qRT-PCR analysis of <i>sbi_06799</i> |
| Qsbi_06799-R | TAGTGGGTGGCGTCCTT       |                                      |
| Qsbi_06873-F | CTGGACCGGCAGGATCT       | qRT-PCR analysis of <i>sbi_06873</i> |
| Qsbi_06873-R | CACAGGTCGGGCTCGTA       |                                      |
| Qsbi_08414-F | ACGCCTCCTTCTTCAACATC    | qRT-PCR analysis of <i>sbi_08414</i> |
| Qsbi_08414-R | GGTGAGGGTGCCTTTGAG      |                                      |

| Name         | Sequence (5'-3')       | Usage                                |
|--------------|------------------------|--------------------------------------|
| Qsbi_08957-F | CTGTACTCGTACACCAAGGAAC | qRT-PCR analysis of <i>sbi_08957</i> |
| Qsbi_08957-R | TCGACCGCCTTCAGGTA      |                                      |
| Qsbi_09057-F | GCGTACTGAACACCGAGAAG   | qRT-PCR analysis of <i>sbi_09057</i> |
| Qsbi_09057-R | GATCTGAGTCTCCAGTTTGAGC |                                      |
| Qsbi_09195-F | GCCTGTACGAGAGTGGTTATC  | qRT-PCR analysis of <i>sbi_09195</i> |
| Qsbi_09195-R | CGCAGATCCAGTGTGTAGG    |                                      |
| Qsbi_09249-F | CACCTTCTACCACCGAAAG    | qRT-PCR analysis of <i>sbi_09249</i> |
| Qsbi_09249-R | AAAGTCGGAGAACGGTGTG    |                                      |
| Qsbi_09652-F | CGTCATGAACAACGACTACGA  | qRT-PCR analysis of <i>sbi_09652</i> |
| Qsbi_09652-R | AATCGAGCACATACGACACC   |                                      |
| Qsbi_10015-F | GACTATGCCTTCCACAGCAA   | qRT-PCR analysis of <i>sbi_10015</i> |
| Qsbi_10015-R | CCTGTGACGGTGGAGTAGA    |                                      |



## References

1. Zhang, Y.; He, H.; Liu, H.; Wang, H.; Wang, X.; Xiang, W. Characterization of a pathway-specific activator of milbemycin biosynthesis and improved milbemycin production by its overexpression in *Streptomyces bingchenggensis*. *Microb. Cell Fact.* **2016**, *15*, 152.
2. Wang, H.; Zhang, J.; Zhang, Y.; Zhang, B.; Liu, C.; He, H.; Wang, X.; Xiang, W. Combined application of plasma mutagenesis and gene engineering leads to 5-oxomilbemycins A3/A4 as main components from *Streptomyces bingchenggensis*. *Appl. Microbiol. Biotechnol.* **2014**, *98*, 9703–9712.
3. Kim, M.S.; Cho, W.J.; Song, M.C.; Park, S.W.; Kim, K.; Kim, E.; Lee, N.; Nam, S.J.; Oh, K.H.; Yoon, Y.J. Engineered biosynthesis of milbemycins in the avermectin high-producing strain *Streptomyces avermitilis*. *Microb. Cell Fact.* **2017**, *16*, 9.
4. Keiser, T.; Bipp, M.; Buttner, M.; Chater, K.F.; Hopwood, D.A. *Practical Streptomyces Genetics*. The John Innes Foundation, Norwich, UK, 2000.
5. Li, L.; Wei, K.; Zheng, G.; Liu, X.; Chen, S.; Jiang, W.; Lu, Y. CRISPR-Cpf1-Assisted Multiplex Genome Editing and Transcriptional Repression in *Streptomyces*. *Appl. Environ. Microbiol.* **2018**, *84*, e00827-18.
